# Supplementary material for: Fast, selective and metal-free ring-opening polymerization to synthesize polycarbonate/polyester copolymers with high incorporation of ethylene carbonate using an organocatalytic phosphazene base
Source: Royal Society of Chemistry journal article supplement (doi:10.1039/c9py01319a), 2019-01-01
Supplement: c9py01319a1.pdf [file c9py01319a1.pdf]

**Supporting Information for Manuscript Entitled**

**Fast, Selective and Metal-Free Ring-Opening  
Polymerization to Synthesize Polycarbonate/Polyester  
Copolymers with High Incorporation of Ethylene  
Carbonate by Organocatalytic Phosphazene Base**

Chuanzhi Wei, Xinhui Kou, Shaofeng Liu,\* and Zhibo Li\*

Key Laboratory of Biobased Polymer Materials, Shandong Provincial Education  
Department; College of Polymer Science and Engineering, Qingdao University of  
Science and Technology, Qingdao 266042, China.

\*Corresponding Author: E-mail: [shaofengliu@qust.edu.cn](mailto:shaofengliu@qust.edu.cn) and [zbli@qust.edu.cn](mailto:zbli@qust.edu.cn)

**Table S1. Copolymerization of EC and CL at different times.<sup>a</sup>**

| run | Time (s) | EC conv. <sup>b</sup> (%) | CL conv. <sup>b</sup> (%) | EC inserted <sup>c</sup> (mol%) |
|-----|----------|---------------------------|---------------------------|---------------------------------|
| 1   | 5        | 21                        | 34                        | 42.0                            |
| 2   | 10       | 29                        | 49                        | 38.5                            |
| 3   | 20       | 34                        | 58                        | 37.9                            |
| 4   | 30       | 36                        | 62                        | 37.5                            |
| 5   | 40       | 37                        | 67                        | 35.2                            |
| 6   | 60       | 38                        | 69                        | 37.3                            |
| 7   | 80       | 40                        | 72                        | 36.2                            |
| 8   | 100      | 40                        | 74                        | 35.7                            |
| 9   | 120      | 40                        | 75                        | 35.2                            |

<sup>a</sup>Conditions: **CTPB** 0.04 mmol; EC/CL/B/I = 500:500:1:1; [EC]<sub>0</sub> was 2.0 mol L<sup>-1</sup>; 20 °C in toluene; the base and initiator were mixed firstly in toluene, followed by addition of monomers. <sup>b</sup>Determined by <sup>1</sup>H NMR of reaction solution. <sup>c</sup>Determined by <sup>1</sup>H NMR of resulted polymer.

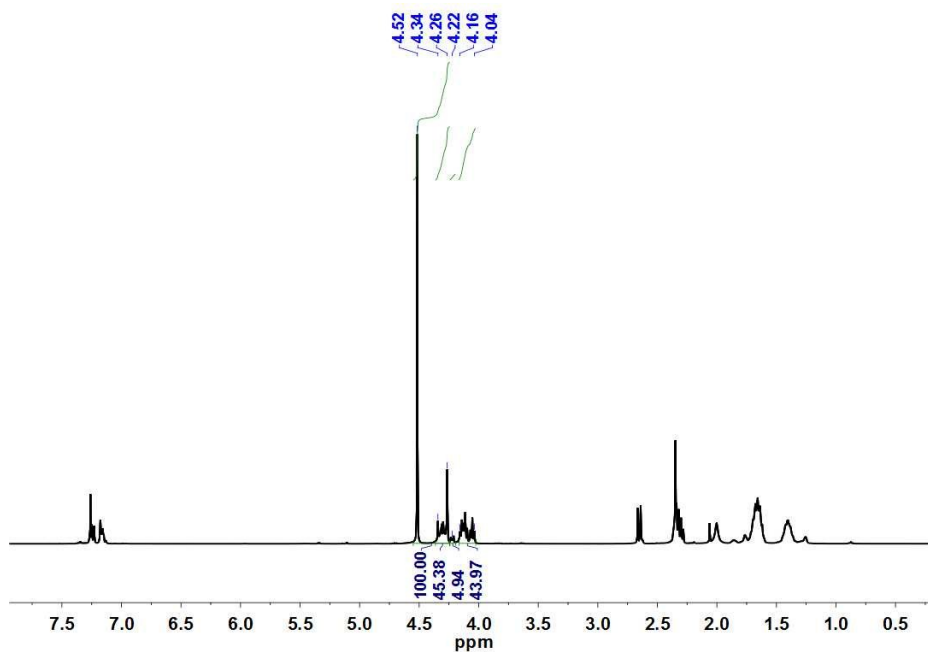

**Figure S1.** In situ  $^1\text{H}$  NMR spectrum of polymerization mixture in Table 1, run 3 (conv.: EC 45% and CL 90%).

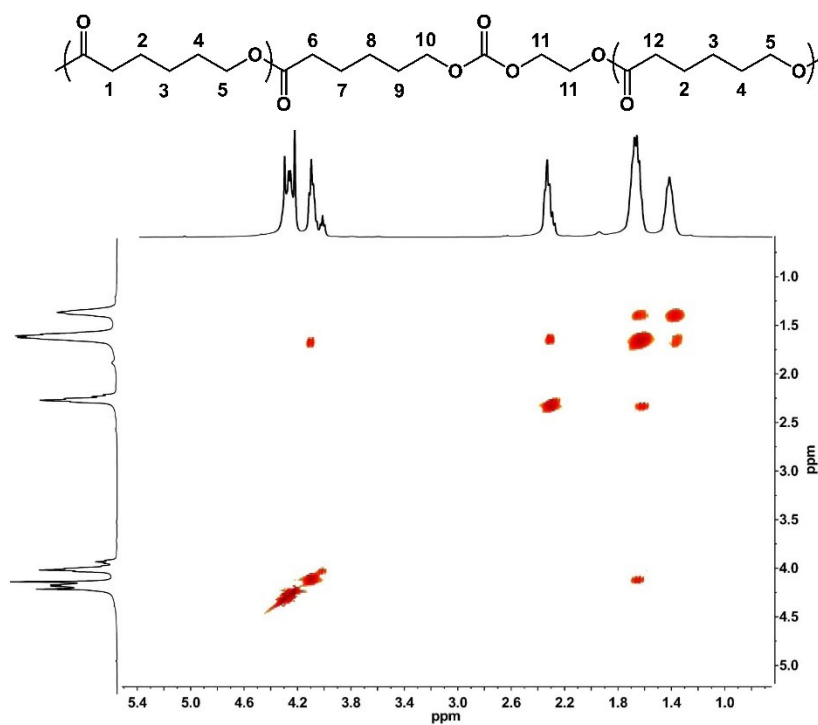

**Figure S2.**  $^1\text{H}$ - $^1\text{H}$  COSY NMR spectrum of P(EC-*co*-CL) copolymer obtained in Table 1 run 3.

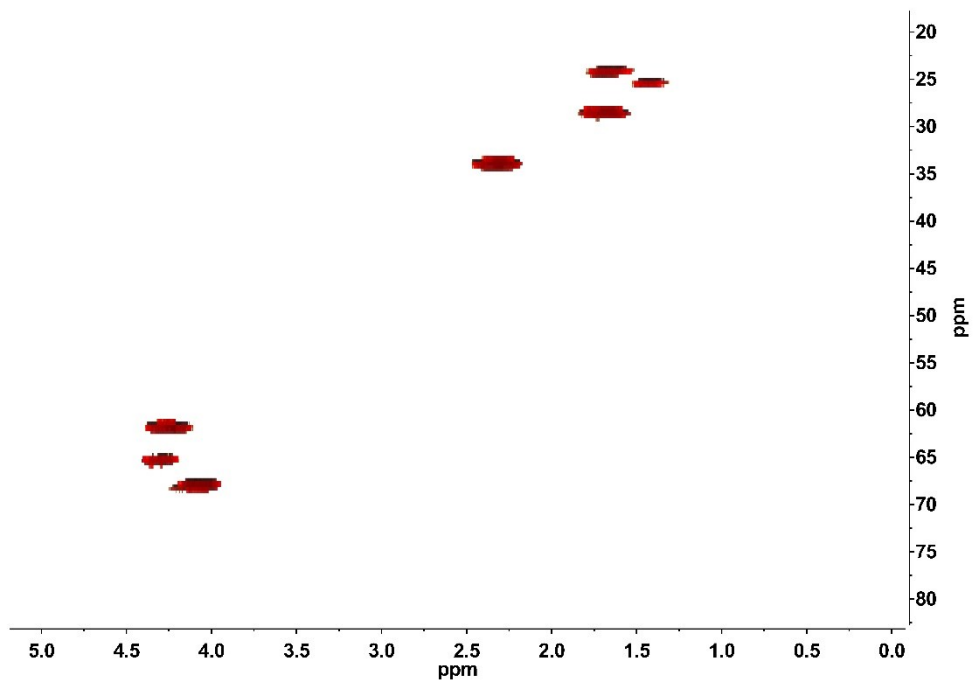

**Figure S3.**  $^1\text{H}$ - $^{13}\text{C}$  HSQC NMR spectrum of P(EC-*co*-CL) copolymer obtained in Table 1 run 3.

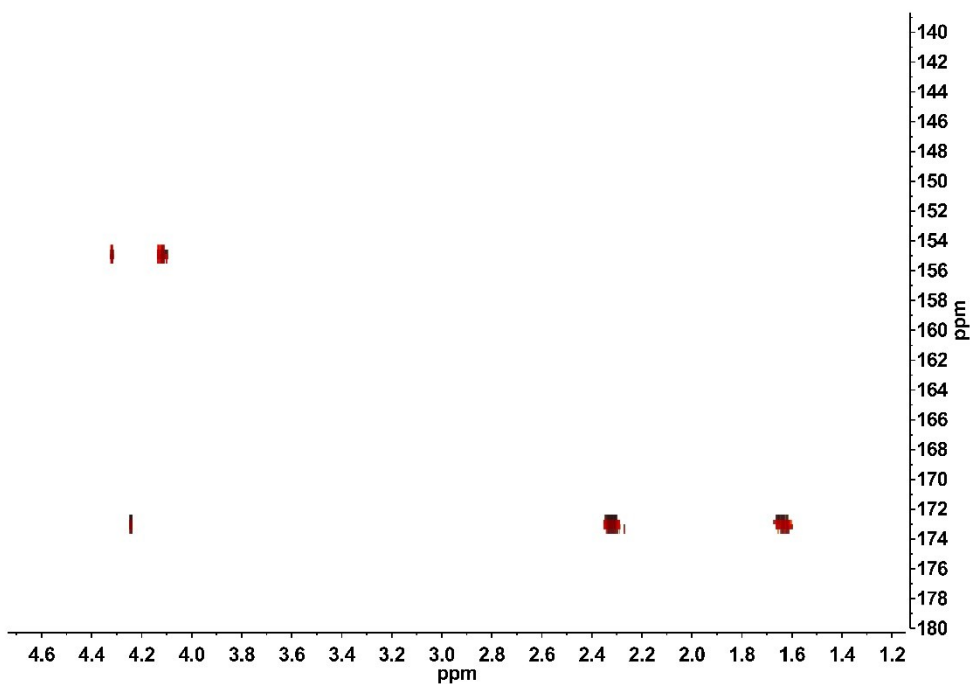

**Figure S4.**  $^1\text{H}$ - $^{13}\text{C}$  HMBC NMR spectrum of P(EC-*co*-CL) copolymer obtained in Table 1 run 3.

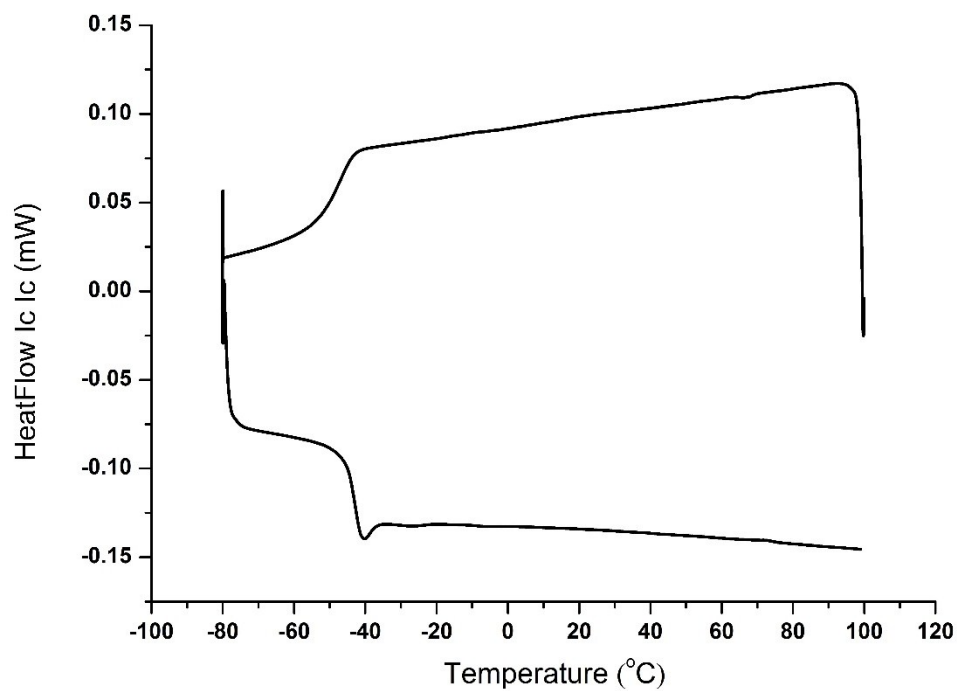

**Figure S5.** DSC trace of a P(EC-co-CL) copolymer with a 35% mol% of EC (Table 1 run 3).

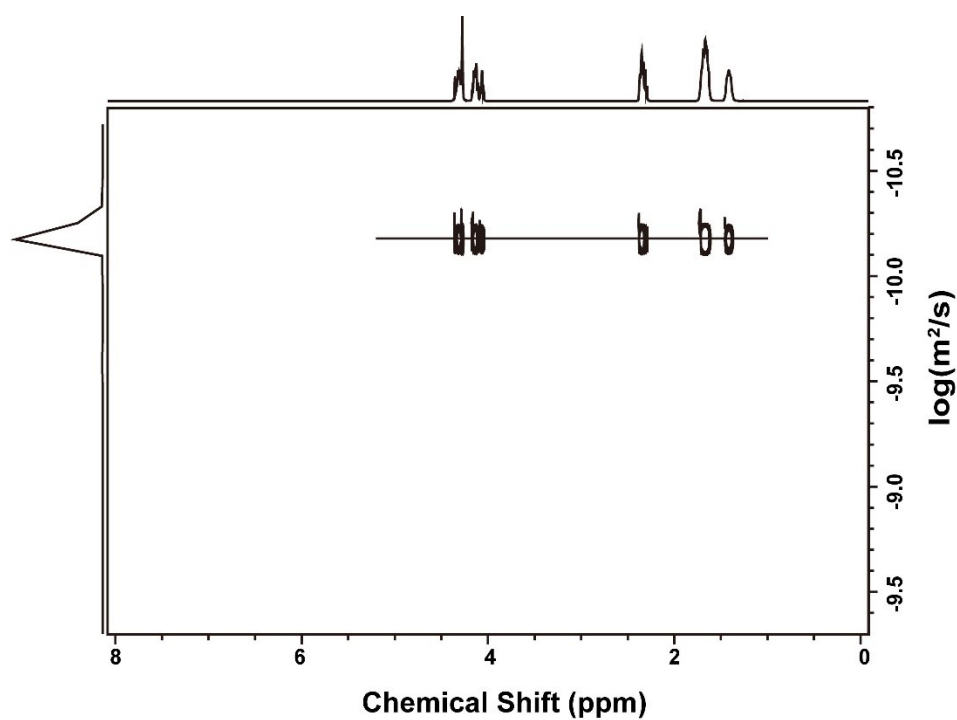

**Figure S6.** DOSY NMR spectrum of a P(EC-co-CL) copolymer in  $\text{CDCl}_3$  (Table 1 run 3).

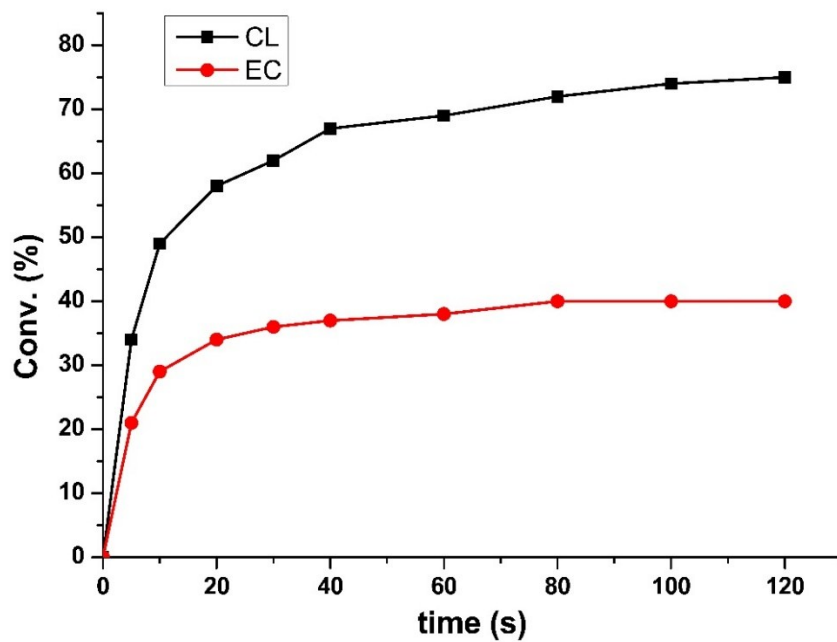

**Figure S7.** Conversions of CL and EC at different polymerization times with EC/CL/CTPB/BnOH = 500/500/1/1 in Table S1.

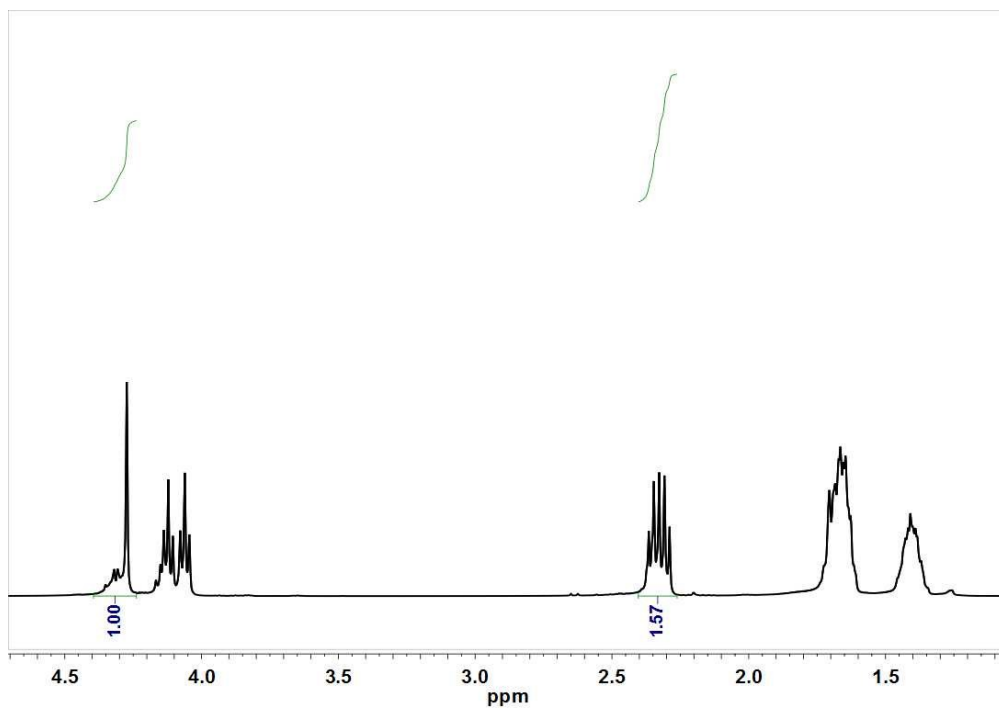

**Figure S8.**  $^1\text{H}$  NMR spectrum (400 MHz,  $\text{CDCl}_3$ , 25  $^\circ\text{C}$ ) of P(EC-*co*-CL) copolymer with a 24 mol% incorporation of EC prepared by CTPB/BnOH (Table 1, run 2).

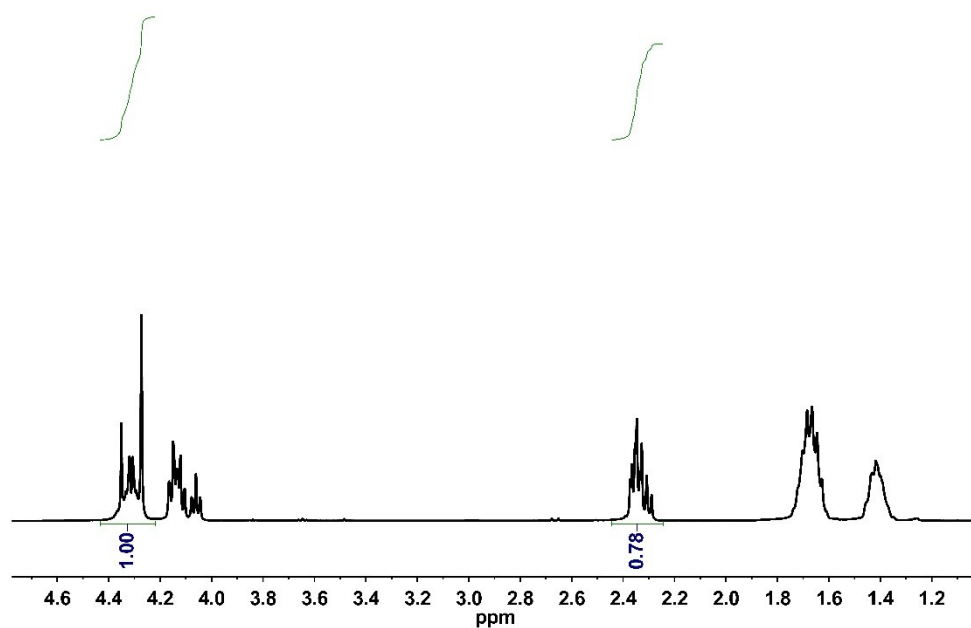

**Figure S9.** <sup>1</sup>H NMR spectrum (400 MHz, CDCl<sub>3</sub>, 25 °C) of P(EC-co-CL) copolymer with a 39 mol% incorporation of EC prepared by **CTPB**/BnOH (Table 1, run 4).

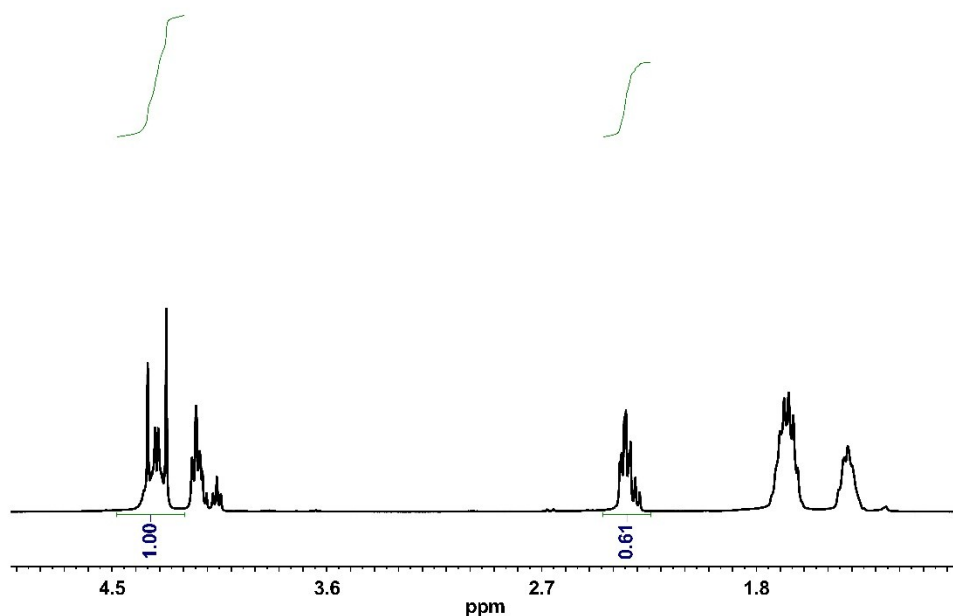

**Figure S10.** <sup>1</sup>H NMR spectrum (400 MHz, CDCl<sub>3</sub>, 25 °C) of P(EC-co-CL) copolymer with a 45 mol% incorporation of EC prepared by **CTPB**/BnOH (Table 1, run 5).

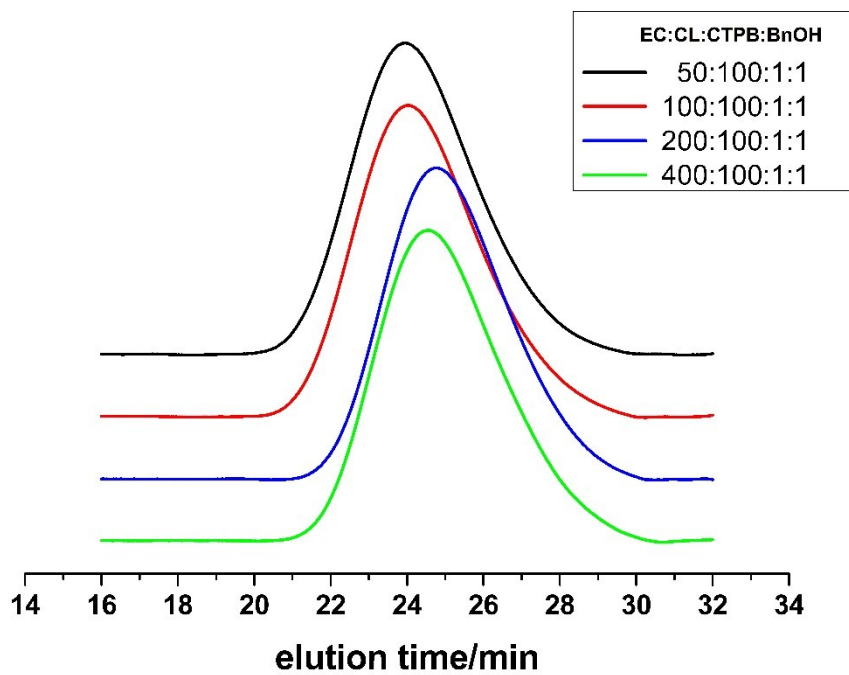

**Figure S11.** SEC curves of P(EC-*co*-CL) with different EC incorporation (Table 1, runs 2-5).

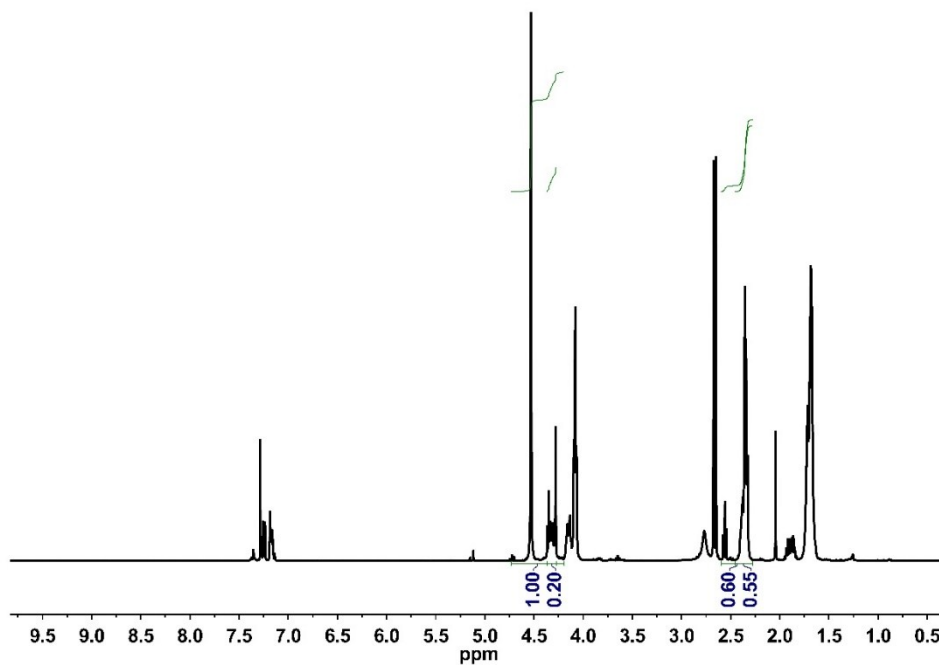

**Figure S12.** In situ  $^1\text{H}$  NMR spectrum of polymerization mixture in Table 1, run 12 (conv.: EC 20% and VL 92%).



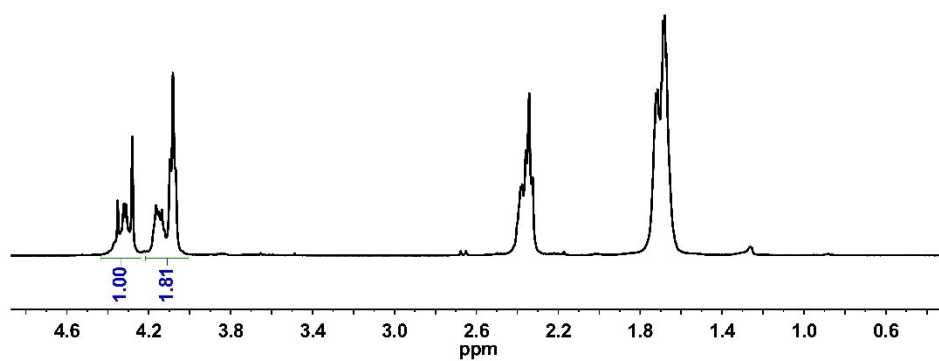

**Figure S13.**  $^1\text{H}$  NMR spectrum (400 MHz,  $\text{CDCl}_3$ , 25  $^\circ\text{C}$ ) of P(EC-*co*-VL) copolymer with a 22 mol% incorporation of EC prepared by **CTPB**/BnOH (Table 1, run 13).

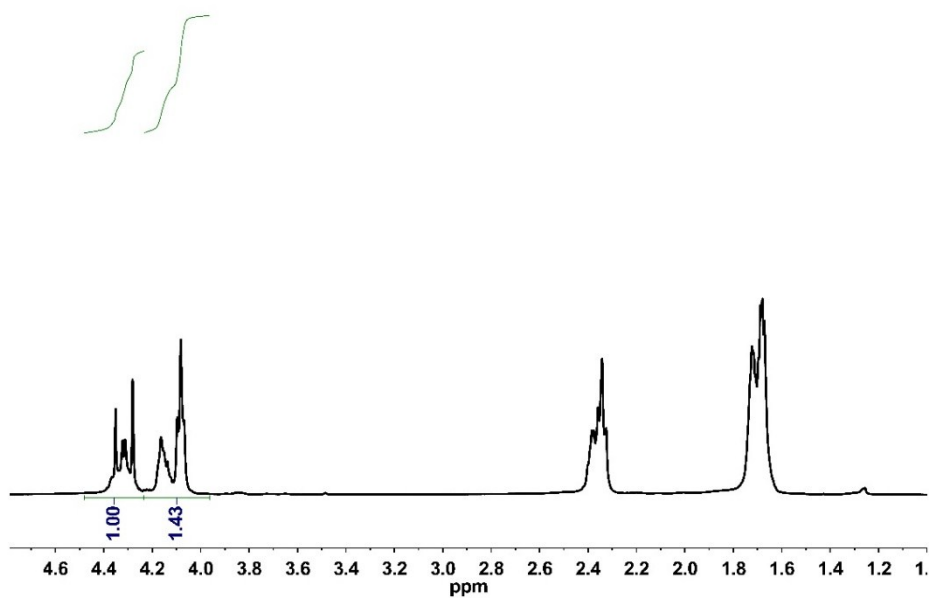

**Figure S14.**  $^1\text{H}$  NMR spectrum (400 MHz,  $\text{CDCl}_3$ , 25  $^\circ\text{C}$ ) of P(EC-*co*-VL) copolymer with a 26 mol% incorporation of EC prepared by **CTPB**/BnOH (Table 1, run 14).

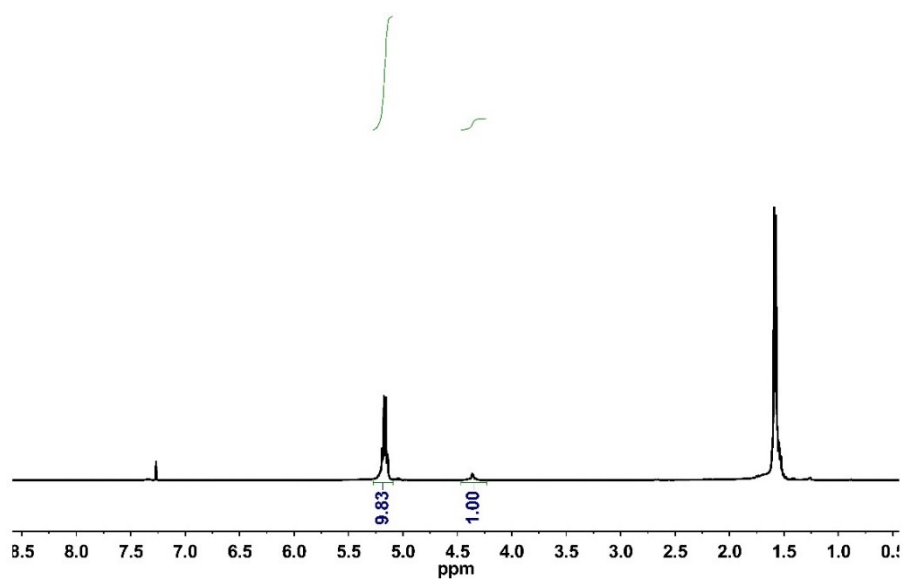

**Figure S15.**  $^1\text{H}$  NMR spectrum (400 MHz,  $\text{CDCl}_3$ , 25  $^\circ\text{C}$ ) of P(EC-*co*-LA) copolymer with a 4.8 mol% incorporation of EC prepared by CTPB/BnOH (Table 1, run 15).

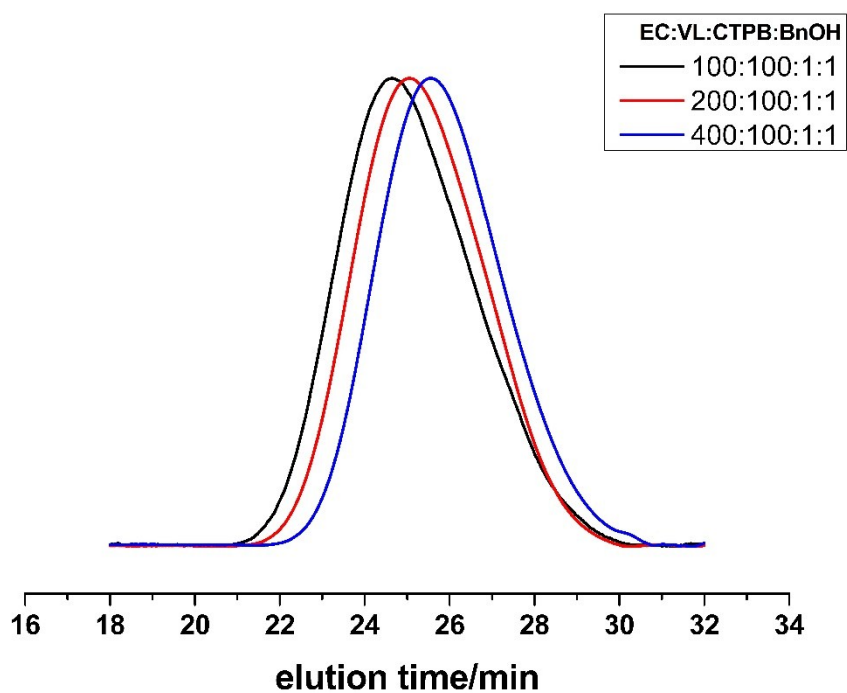

**Figure S16.** SEC curves of P(EC-*co*-VL) copolyesters obtained in Table 1, runs 12–14.
